Development 133, 4793 (2006) doi:10.1242/dev.02713

## A garden of Notch-ly delights

**Gerry Weinmaster and Raphael Kopan**

There was an error published in *Development* **133**, 3277-3282.

There was a mistake in the first paragraph of this meeting review, which should read as follows:

Hosted by the Cantoblanco Workshops on Biology and organized by José Luis de la Pompa, Tom Gridley and Juan Carlos Izpisúa Belmonte, the meeting covered diverse aspects of this important signaling pathway.

The authors apologize to readers for this mistake.
